# Supplementary material for: NiFe2O4nanoparticles: an efficient and reusable catalyst for the selective oxidation of benzyl alcohol to benzaldehyde under mild conditions
Source: Royal Society of Chemistry journal article supplement (doi:10.1039/d0na00591f), 2020-01-01

## **Electronic Supplementary Materials**

### **NiFe<sub>2</sub>O<sub>4</sub> nanoparticles: An efficient and reusable catalyst for the selective oxidation of benzyl alcohol to benzaldehyde under mild conditions**

Saddam Iraqui, Siddhartha Shankar Kashyap, and Md. Harunar Rashid\*

Department of Chemistry, Rajiv Gandhi University, Rono Hills, Doimukh 791 112,

Arunachal Pradesh, India

Corresponding author email: [harunar.rashid@rgu.ac.in](mailto:harunar.rashid@rgu.ac.in)

#### ***Characterization of the product***

X-ray diffraction (XRD) study of the dried powder samples was carried out on a Bruker D8 Advance powder X-ray diffractometer using Cu  $k_{\alpha}$  radiation with a wavelength of 0.154 nm. For scanning electron microscopic (SEM) study, a small amount of the dry powder samples were spread on a carbon tape posted on an aluminum stub and then sputter-coated with platinum to minimize the charging effect. The micrographs were then recorded in a field emission scanning electron microscope (FESEM) (Carl Zeiss SUPRA 55 FESEM) at an accelerating voltage of 5 kV. For transmission electron microscopic (TEM) studies, a drop of an aqueous suspension of individual powder sample was cast on a carbon-coated copper grid. The excess solutions were soaked with a tissue paper followed by drying in air. The micrographs were then recorded in a high-resolution JEOL electron microscope (JEM 2100EM) at an accelerating voltage of 200 kV. Dried powder of the samples was subjected to magnetic measurements at room temperature using a Physical Property Measurement System (Quantum Design PPMS-VSM). X-ray photoelectron spectroscopy (XPS) analyses of the dried powder samples were performed in Thermo Fisher Scientific, UK makes ESCALB Xi<sup>+</sup> X-ray photoelectron spectrometer using Al  $k_{\alpha}$  radiations with an incident energy of 1486.61 eV. The instrument was operated at 15 kV and 300 W at ambient temperature under ultrahigh

vacuum. The charging effect on the sample was corrected by setting the binding energy of the carbon (C-1s) at 284.6 eV and this carbon peak was used as a reference position for scaling all the other peaks. Fourier transforms infrared (FTIR) spectra of the powder samples were collected in a Thermo Scientific Nicolet iS5 spectrophotometer in the range of 4000–400  $\text{cm}^{-1}$ . The pellets for recording the FTIR spectra were prepared by mixing the powder sample with dried KBr in the weight ratio of 1:100.  $^1\text{H}$  and  $^{13}\text{C}$  NMR spectra were recorded in a JNM ECS 400 MHz NMR spectrophotometer (JEOL) using tetramethylsilane (TMS) as the internal standard. Chemical shift values are expressed in ppm. Coupling constants are expressed in Hertz.

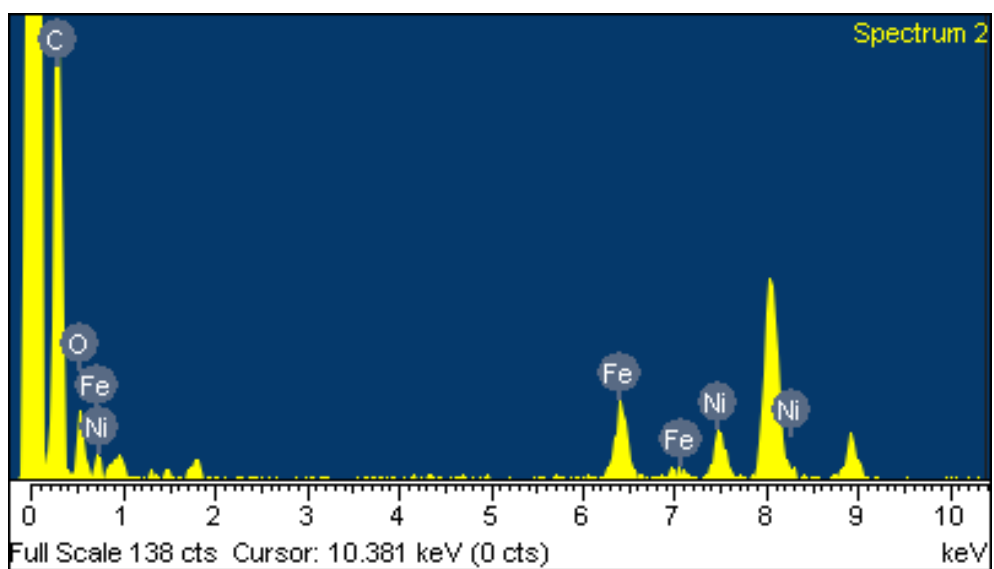

**Figure S1.** EDX spectrum of  $\text{NiFe}_2\text{O}_4$  NPs recorded from sample  $\text{NiFe}_2\text{O}_4$ -4.

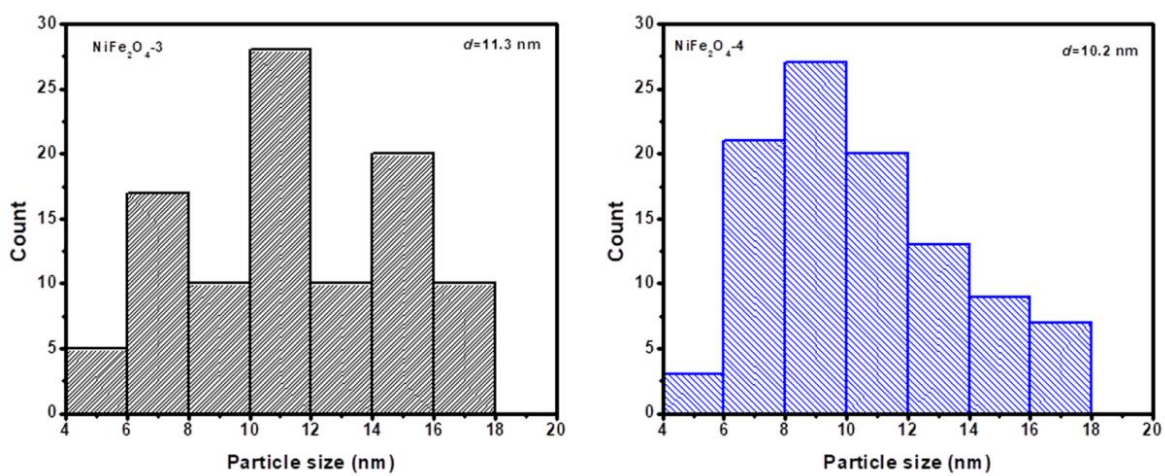

**Figure S2.** Histograms showing the particle size distribution of NiFe<sub>2</sub>O<sub>4</sub> NPs in different samples.

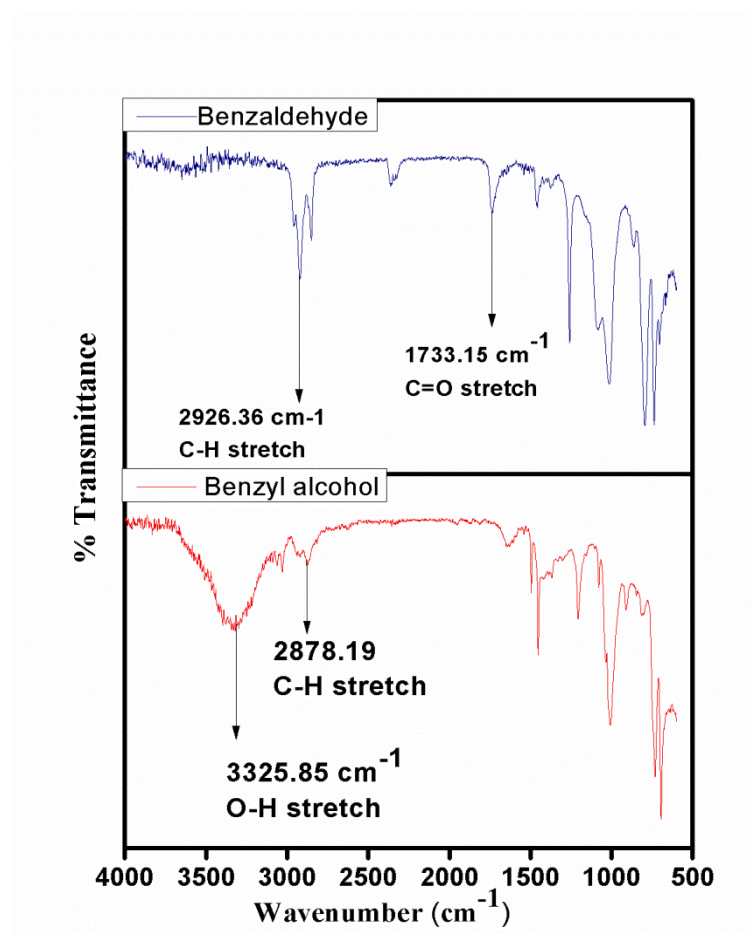

**Figure S3.** FTIR spectra of benzyl alcohol and its product (benzaldehyde).

## Product characterization

### Benzaldehyde (Entry 1, Table 3)

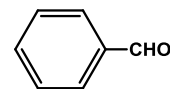

Appearance: Colourless

State: liquid

$^1\text{H}$  NMR ( $\text{CDCl}_3$ , 400 MHz):  $\delta$  10.2 (s, 1H), 7.89-7.87 (d,  $J=8\text{Hz}$ , 2H), 7.65-7.61 (t,  $J=8\text{Hz}$ , 2H), 7.55-7.51 (t, 2H) ppm

### 2-Nitro benzaldehyde (Entry 2, Table 3)

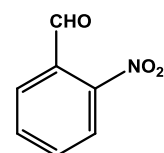

Appearance: white

State: Solid; mp=43-46 °C

$^1\text{H}$  NMR ( $\text{CDCl}_3$ , 500 MHz):  $\delta$  10.404 (s, 1H), 8.112-8.095 (t,  $J=4.5$  Hz 1H), 7.944-7.927 (m, 1H), 7.803-7.732 (m, 2H) ppm

$^{13}\text{C}$  NMR ( $\text{CDCl}_3$ , 125 MHz):  $\delta$  188.125, 149.925, 134.056, 133.677, 131.229, 129.598, 124.462 ppm

### 4-Nitro benzaldehyde (Entry 4, Table 3)

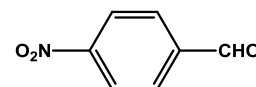

Appearance: Pale yellow

State: Solid; mp = 104-106 °C

$^1\text{H}$  NMR ( $\text{CDCl}_3$ , 500 MHz):  $\delta$  10.096 (s, 1H), 8.342-8.325 (2,  $J=4.5$  Hz t), 8.027-8.001 (2, m) ppm

$^{13}\text{C}$  NMR ( $\text{CDCl}_3$ , 125 MHz):  $\delta$  190.375, 151.220, 140.121, 130.573, 124.403 ppm

#### 4-Bromo benzaldehyde (Entry 6, Table 3)

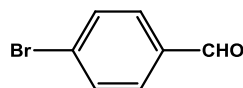

Appearance: White

State: solid; mp=57 °C

$^1\text{H}$  NMR ( $\text{CDCl}_3$ , 400 MHz):  $\delta$  9.97 (s, 1H), 7.75-7.73 (d,  $J=8$  Hz, 2H), 7.69-7.67 (d,  $J=8$  Hz, 2H) ppm

$^{13}\text{C}$  NMR ( $\text{CDCl}_3$ , 100 MHz): 191.26, 135.20, 132.67, 131.12, 129.86 ppm

#### 2-Chloro benzaldehyde (Entry 7, Table 3)

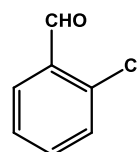

Appearance: Yellow coloured

State: Liquid

$^1\text{H}$  NMR ( $\text{CDCl}_3$ , 400 MHz):  $\delta$  9.872 (s, 1H), 7.835-7.818 (m, 1H), 7.55-7.52 (m, 1H), 7.46-7.40 (m, 1H), 7.38-7.36 (d, 1H) ppm.

#### 4-Chloro benzaldehyde (Entry 8, Table 3)

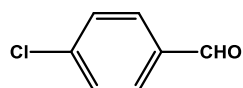

Appearance: Pale yellow

State: Powder; mp=45 °C

$^1\text{H}$  NMR ( $\text{CDCl}_3$ , 400 MHz):  $\delta$  9.93 (s, 1H), 7.78-7.76 (d,  $J=8$  Hz, 2H), 7.47-7.45 (d,  $J=8$  Hz, 2H) ppm

$^{13}\text{C}$  NMR ( $\text{CDCl}_3$ , 100 MHz): 190.97, 141.02, 134.85, 131.03, 129.54 ppm

#### 4-Methoxy benzaldehyde (Entry 9, Table 3)

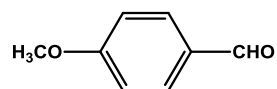

Appearance: Light yellow

State: liquid

$^1\text{H}$  NMR ( $\text{CDCl}_3$ , 500 MHz):  $\delta$  9.87 (s, 1H), 7.835-7.818 (t,  $J=4.25$  Hz, 2H), 7.000-6.983 (t,  $J=4.25$  Hz, 2H), 3.877 (s, 3H) ppm

$^{13}\text{C}$  NMR ( $\text{CDCl}_3$ , 125 MHz):  $\delta$  191.10, 141.02, 134.85, 131.03, 129.54 ppm

# $^1\text{H}$ and $^{13}\text{C}$ NMR of selected isolated products

## $^1\text{H}$ NMR of benzaldehyde

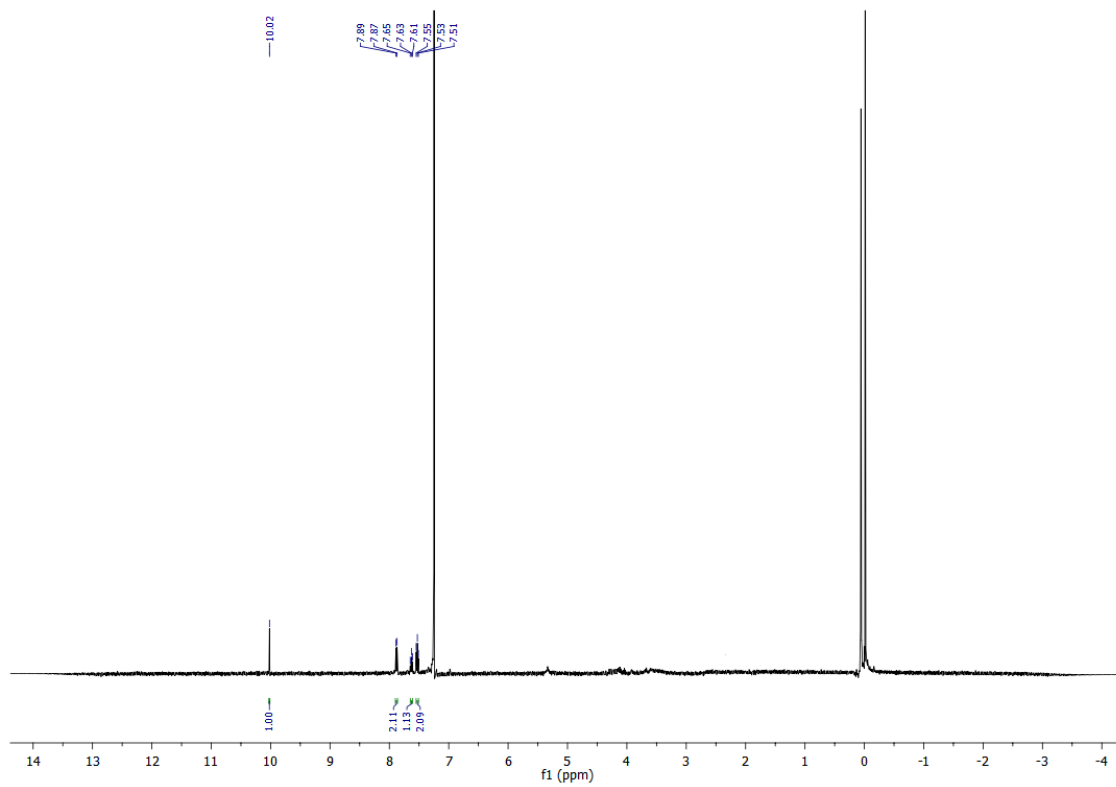



$^1\text{H}$  NMR spectrum of 4-methoxy benzaldehyde

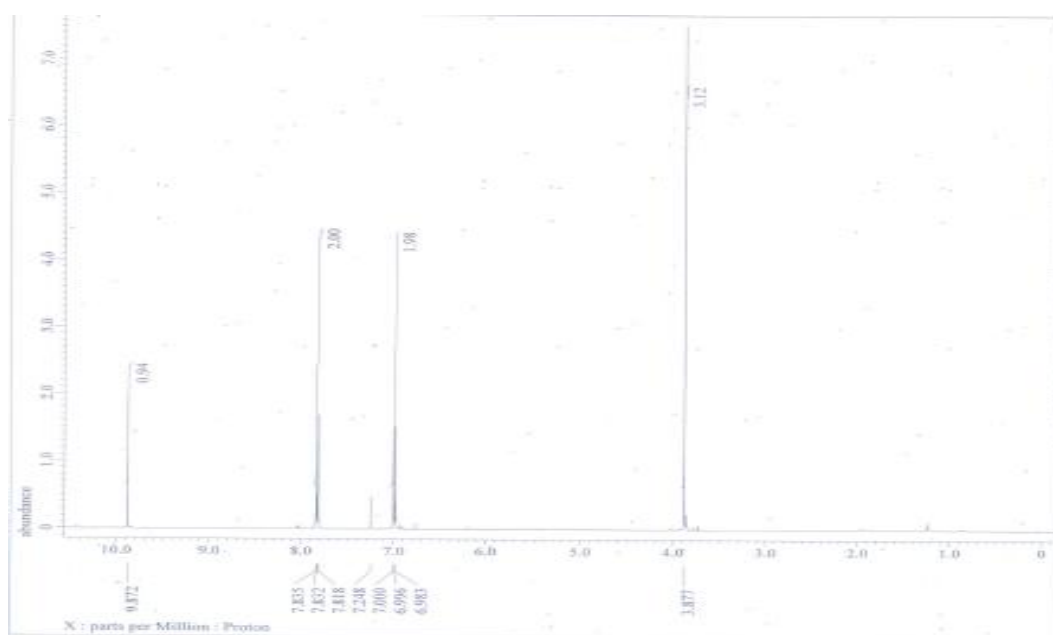

$^{13}\text{C}$  NMR spectrum of 4-methoxy benzaldehyde

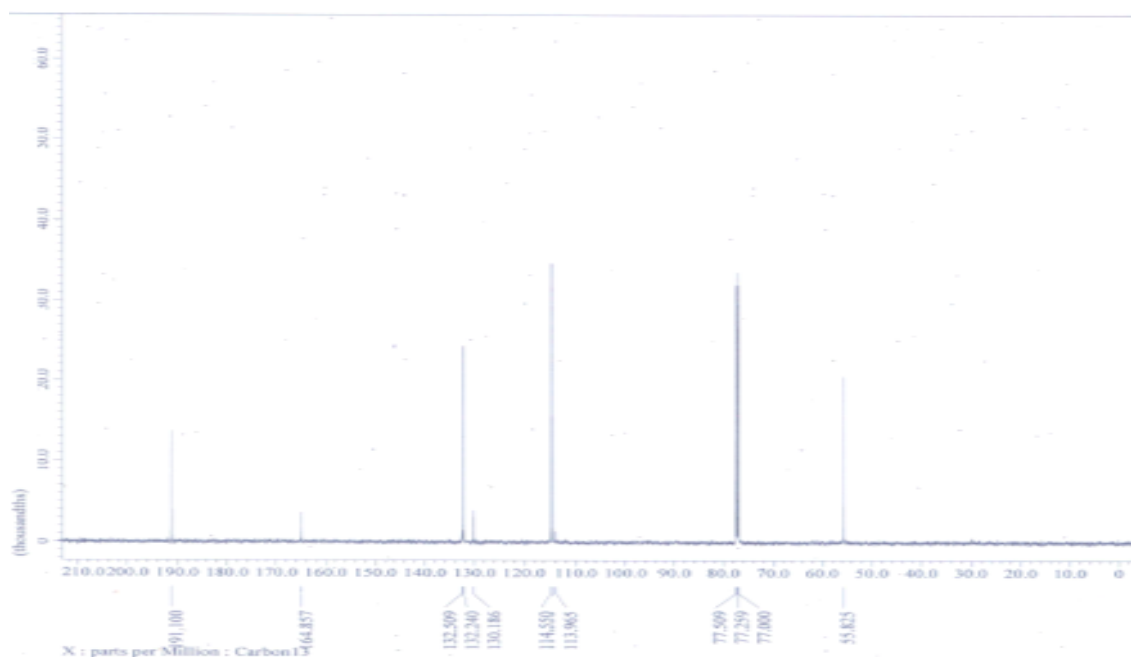

$^1\text{H}$  NMR spectrum of 2-nitro benzaldehyde

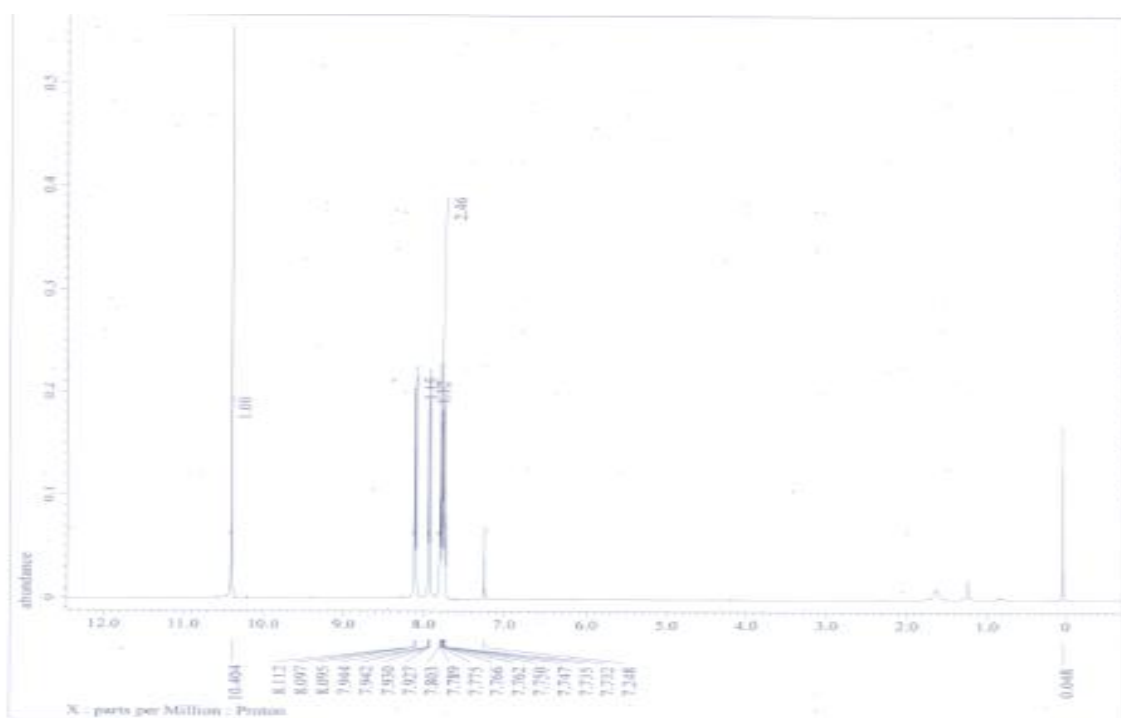

$^{13}\text{C}$  NMR spectrum of 2-nitro benzaldehyde

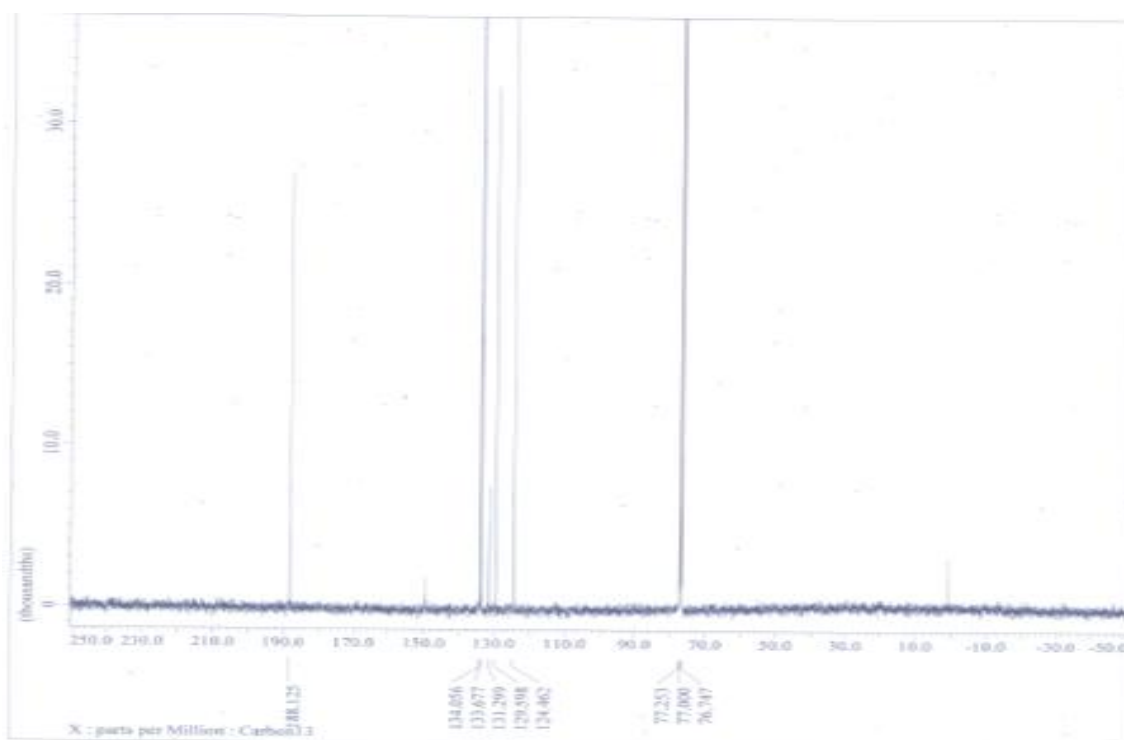

$^1\text{H}$  NMR spectrum of 4-nitro benzaldehyde

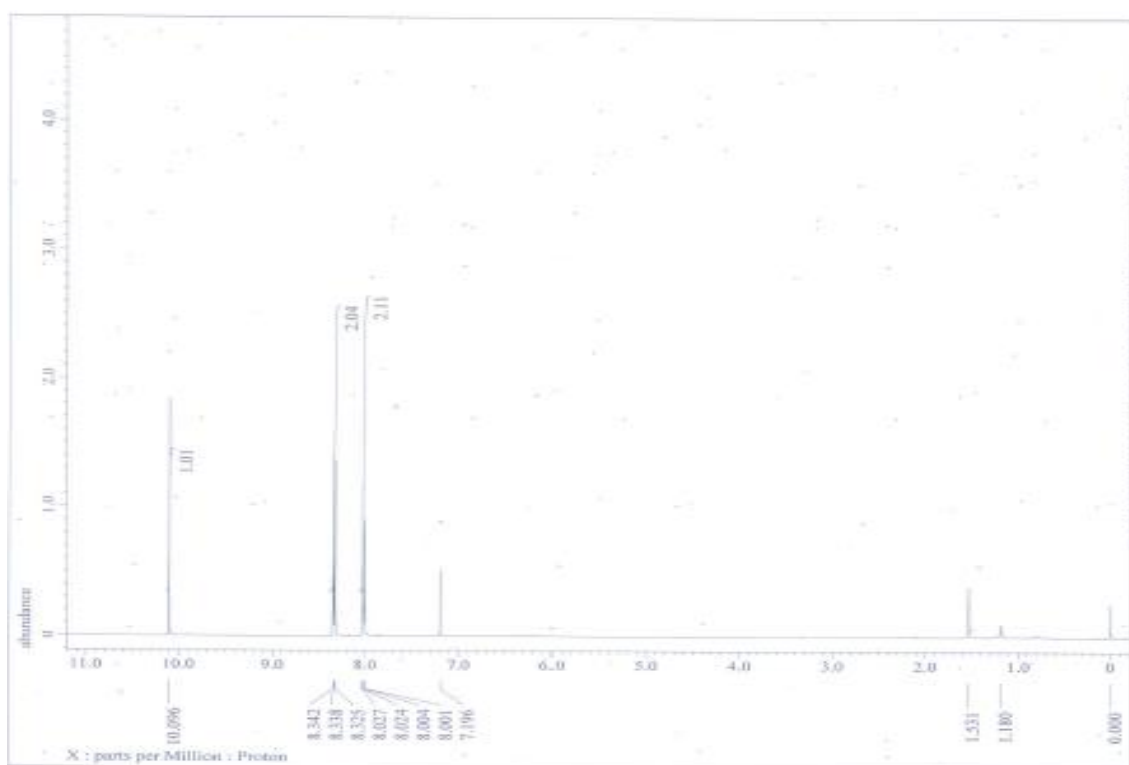

$^{13}\text{C}$  NMR spectrum of 4-nitro benzaldehyde

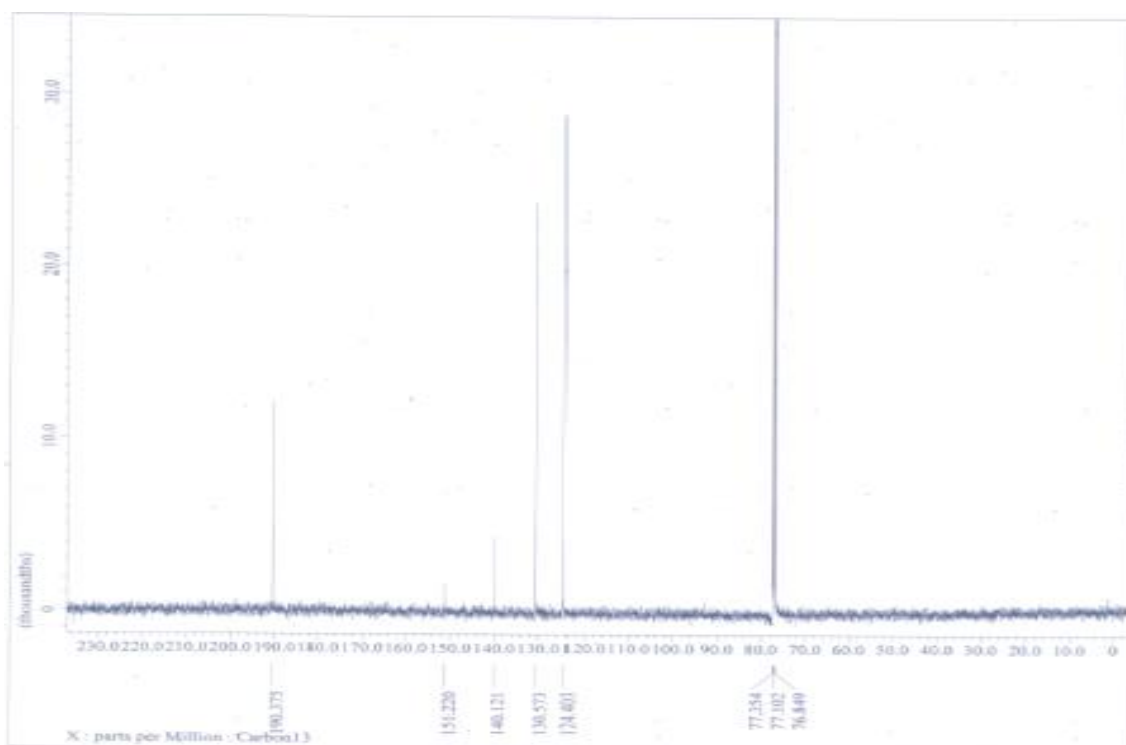

$^1\text{H}$  NMR spectrum of 2-Chloro benzaldehyde

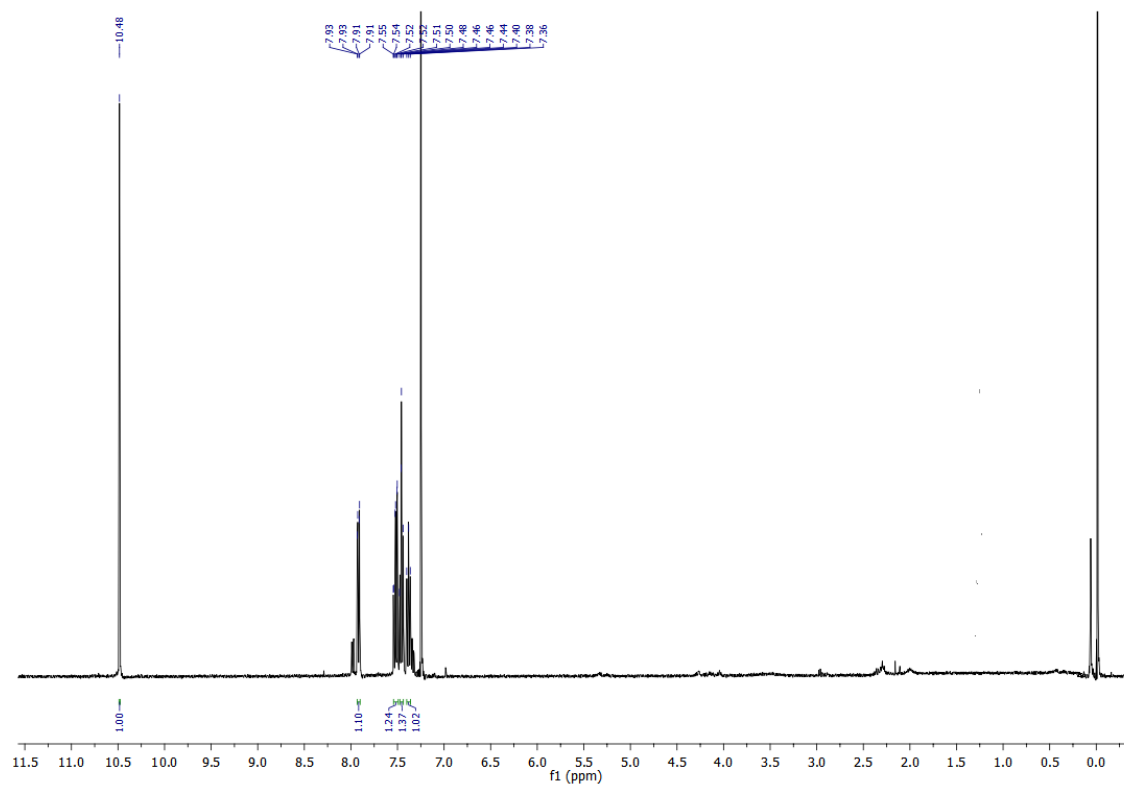

# $^1\text{H}$ NMR spectrum of 4-Chloro benzaldehyde

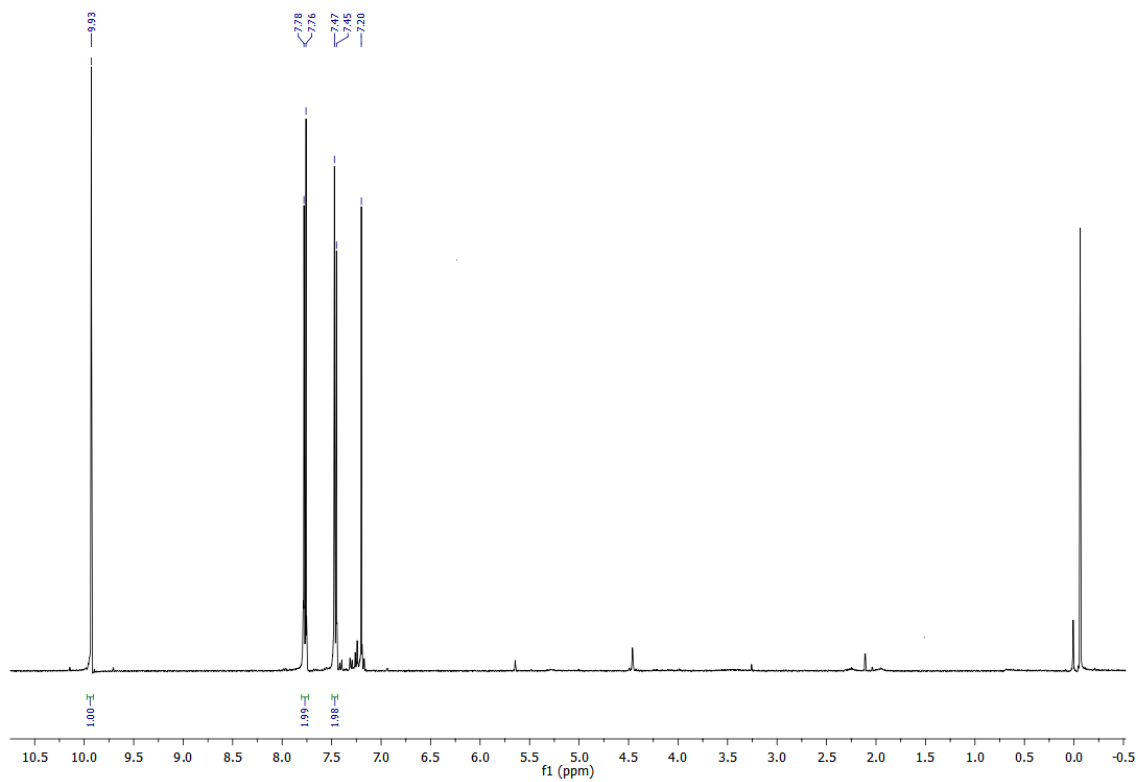

# $^{13}\text{C}$ NMR spectrum of 4-Chloro benzaldehyde

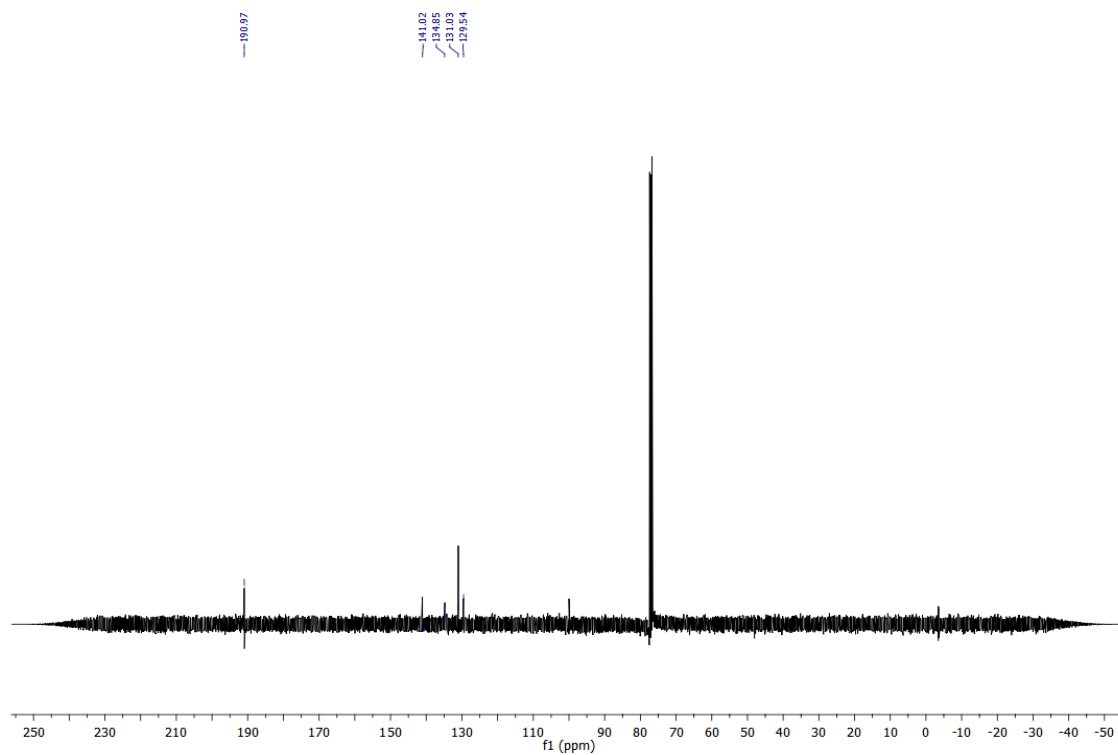

### $^1\text{H}$ NMR spectrum of 4-Bromo benzaldehyde

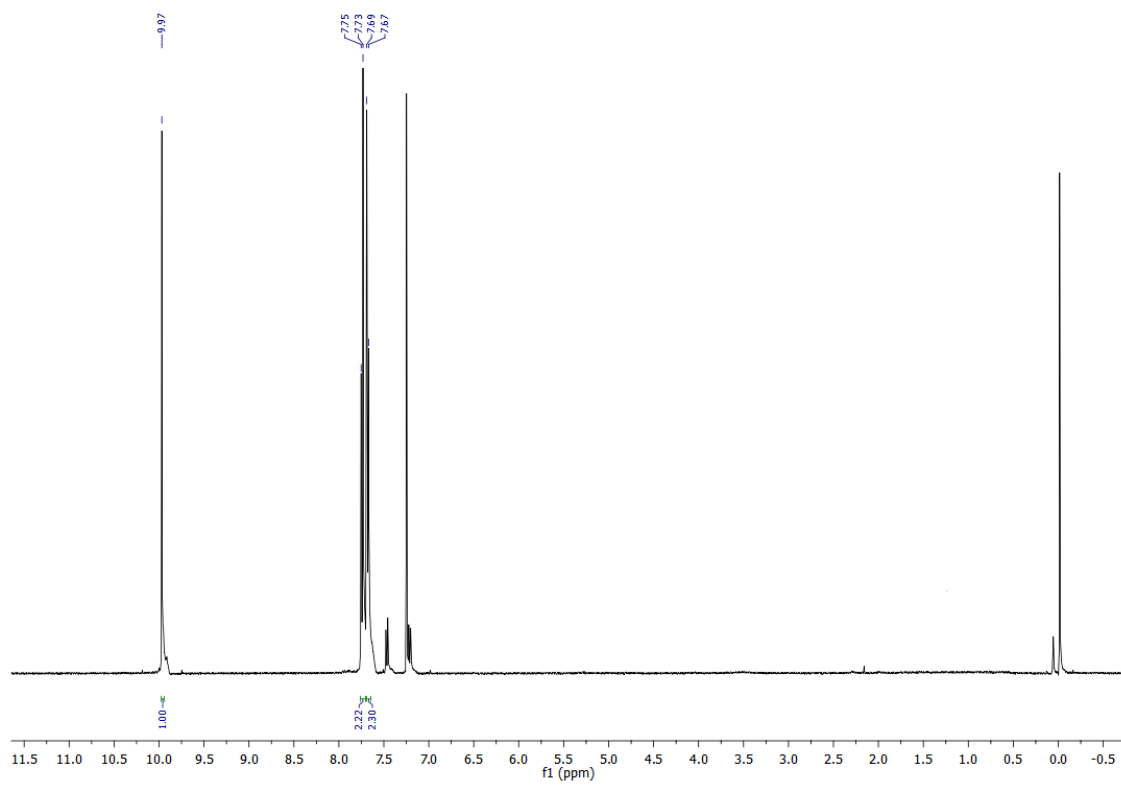

### $^{13}\text{C}$ NMR spectrum of 4-Bromo benzaldehyde

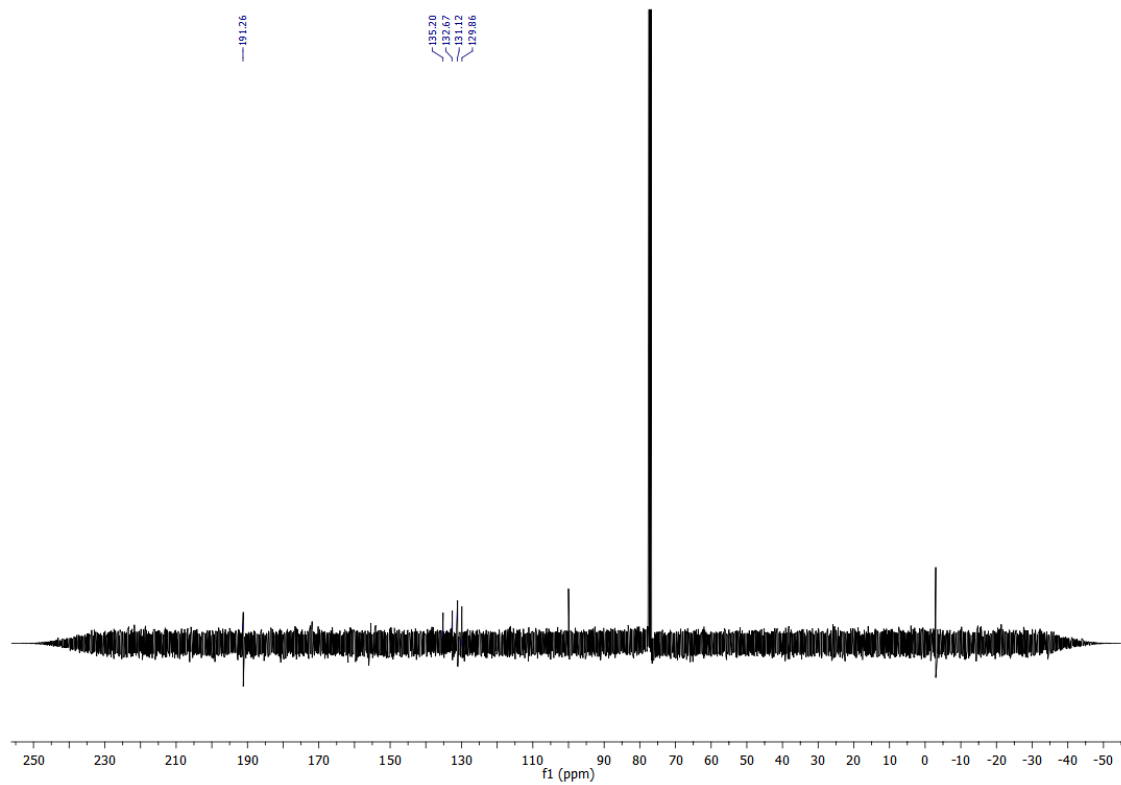

Supplement: d0na00591f1.pdf [file d0na00591f1.pdf]
